# Supplementary material for: Genome-wide profiling and differential expression of microRNA in rat pluripotent stem cells
Source: PubMed Central journal article supplement (PMC5459850; doi:10.1038/s41598-017-02632-0), 2017-06-05
Supplement: 41598_2017_2632_MOESM1_ESM.pdf [file 41598_2017_2632_MOESM1_ESM.pdf]

## **Genome-wide profiling and differential expression of microRNA in rat pluripotent stem cells**

Vladimir V. Sherstyuk<sup>1,2,3,4</sup>, Sergey P. Medvedev<sup>1,2,3,4</sup>, Evgeniy A. Elisaphenko<sup>1,2,3</sup>, Evgeniya A. Vaskova<sup>1,2,3</sup>, Maxim T. Ri<sup>5,6</sup>, Yuri V. Vyatkin<sup>1,4,5,6</sup>, Olga V. Saik<sup>1</sup>, Dmitry N. Shtokalo<sup>1,5,6,7</sup>, Evgeniy A. Pokushalov<sup>2</sup>, Suren M. Zakian<sup>1,2,3,4,\*</sup>

<sup>1</sup>Federal Research Center Institute of Cytology and Genetics, the Siberian Branch of the Russian Academy of Sciences, 10 Lavrentyeva Ave., Novosibirsk, 630090, Russia;

<sup>2</sup>Siberian Federal Biomedical Research Center, Ministry of Healthcare of the Russian Federation, 15 Rechkunovskaya St., Novosibirsk, 630055, Russia;

<sup>3</sup>Institute of Chemical Biology and Fundamental Medicine, the Siberian Branch of the Russian Academy of Sciences, 8 Lavrentyeva Ave., Novosibirsk, 630090, Russia;

<sup>4</sup>Novosibirsk State University, 2 Pirogova St., Novosibirsk, 630090, Russia;

<sup>5</sup>AcademGene LLC, 6 Lavrentyeva Ave., Novosibirsk, 630090, Russia;

<sup>6</sup>St. Laurent Institute, 317 New Boston St., Woburn, MA 01801, USA;

<sup>7</sup>A.P.Ershov Institute of Informatics Systems, 6 Lavrentyeva Ave., Novosibirsk, 630090, Russia;

\* Corresponding author, e-mail: zakian@bionet.nsc.ru
